# Supplementary material for: ZIF-67 derived tricobalt tetroxide induced synthesis of a sandwich layered Co3O4/NiNH electrode material for high performance supercapacitors
Source: Royal Society of Chemistry journal article supplement (doi:10.1039/d0qm00692k), 2020-12-11
Supplement: d0qm00692k1.pdf [file d0qm00692k1.pdf]

## Supporting Information

### ZIF-67 Derived Tricobalt tetroxide Induced Synthesis of Sandwich Layered $\text{Co}_3\text{O}_4/\text{NiNH}$ Electrode Material for High Performance Supercapacitors

Wei Hong, Yawen Li, Yiru Wu, Guifang Li, Lishan Jia.\*

Department of Chemical and Biochemical Engineering, College of Chemistry and  
Chemical Engineering, Xiamen University, Xiamen 361005, Fujian, China

E-mail: Jials@xmu.edu.cn

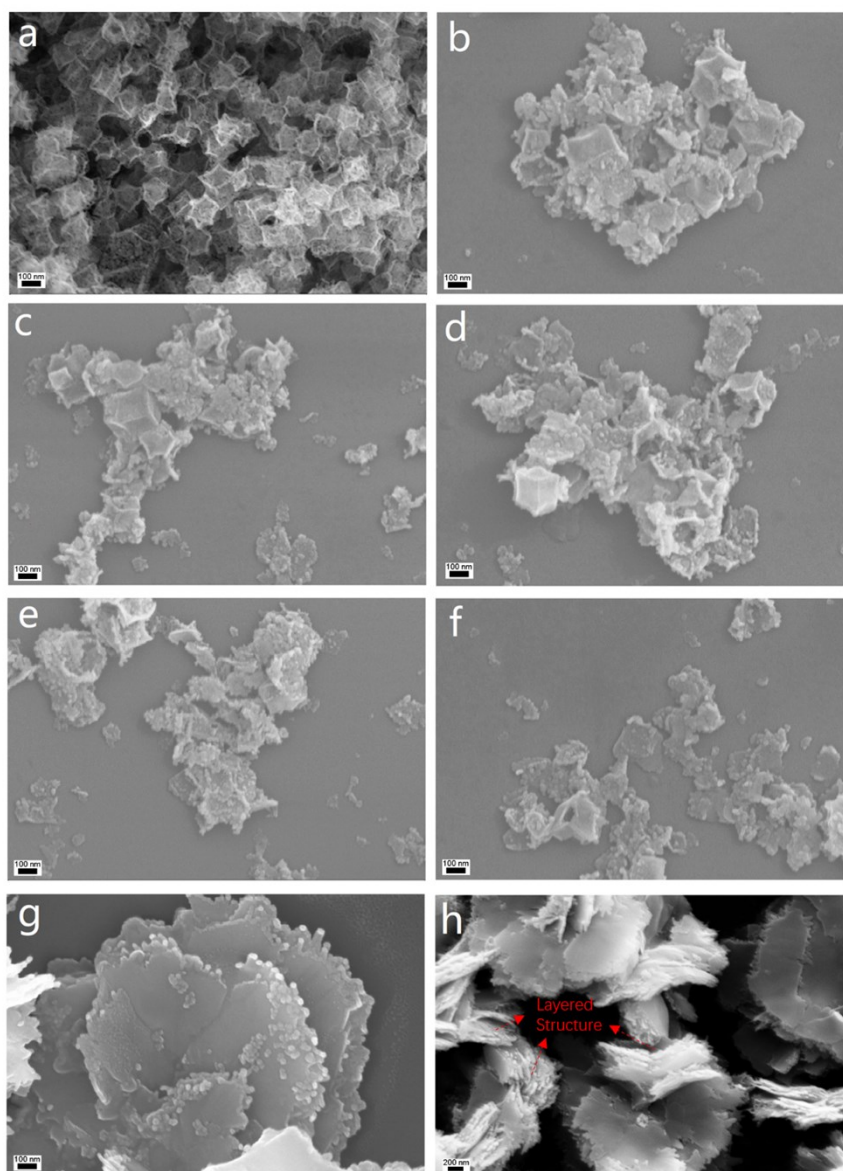

Fig S1. (a) MOF derived  $\text{Co}_3\text{O}_4$ , (b)  $\text{Co}_3\text{O}_4/\text{NiNH}$  1 h, (c)  $\text{Co}_3\text{O}_4/\text{NiNH}$  1.5 h, (d)  $\text{Co}_3\text{O}_4/\text{NiNH}$  2 h, (e)  $\text{Co}_3\text{O}_4/\text{NiNH}$  4 h, (f)  $\text{Co}_3\text{O}_4/\text{NiNH}$  6 h,  $\text{Co}_3\text{O}_4/\text{NiNH}$  12 h (g) and  $\text{Co}_3\text{O}_4/\text{NiNH}$  24 h (h)

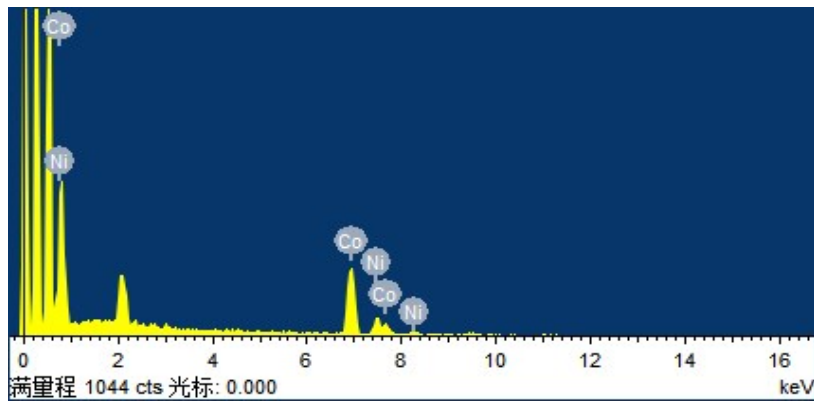

Fig S2. EDS of the  $\text{Co}_3\text{O}_4/\text{NiNH}$

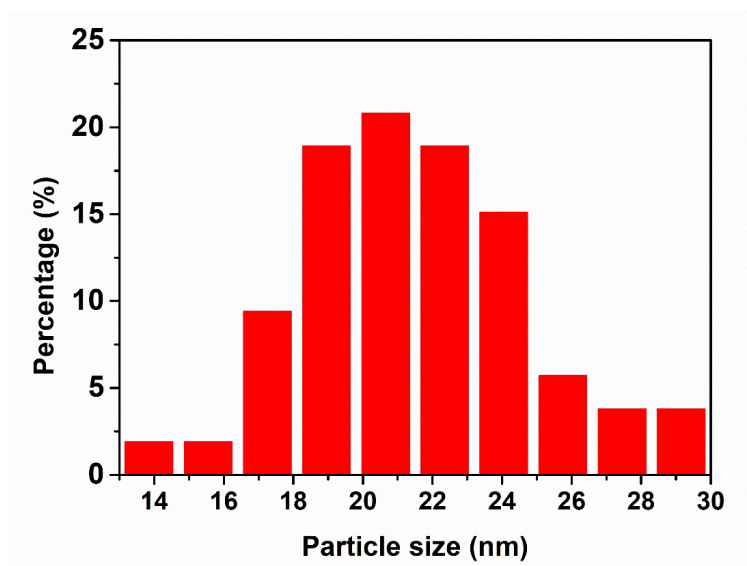

Fig S3. Particle size statistics of  $\text{Co}_3\text{O}_4/\text{NiNH}$

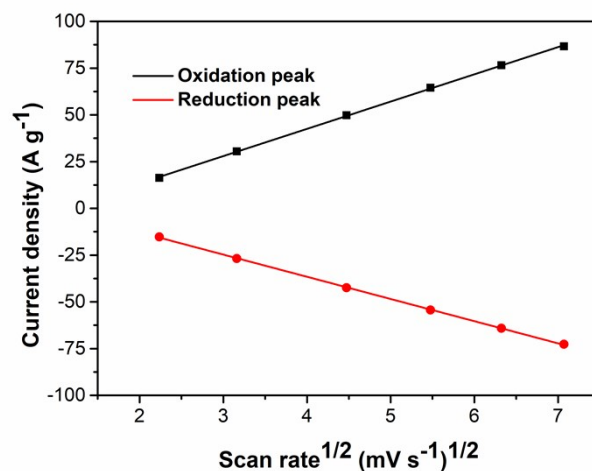

Fig S4. The linear dependence of the oxidation peak and reduction peak current densities vs. the square root of the scan rates for  $\text{Co}_3\text{O}_4/\text{NiNH}$  electrode

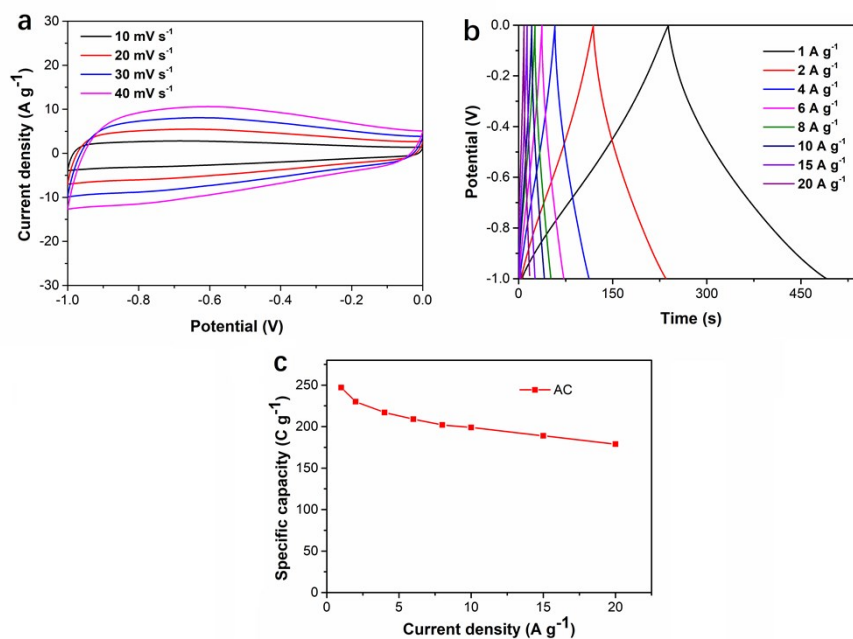

Fig S5. Electrochemical performance of AC electrode, CV curves of AC electrode at different scan rates (a); GCD curves of AC electrode at different current densities(b); the corresponding specific capacities of AC electrode (c)
